# Supplementary material for: An artificial viral capsid decorated with a DNA aptamer internalizing into lymphoma cells
Source: Royal Society of Chemistry journal article supplement (doi:10.1039/d3tb00169e), 2023-01-01
Supplement: d3tb00169e1.pdf [file d3tb00169e1.pdf]

### Supporting Information

Artificial viral capsid decorated with DNA aptamer internalizing into lymphoma cells

Kentarou Sakamoto<sup>a</sup>, Kohsuke Uchiyama<sup>a</sup>, Takashi Iwasaki<sup>b</sup>, Hiroshi Inaba<sup>a,c</sup>, Kazunori Matsuura<sup>a,c</sup>

- a. Department of Chemistry and Biotechnology, Graduate School of Engineering, Tottori University, Tottori 680-8552, Japan
- b. Department of Bioresources Science, Graduate School of Agricultural Sciences, Tottori University, Tottori 680-8553, Japan
- c. Centre for Research on Green Sustainable Chemistry, Tottori University, Tottori 680-8552, Japan

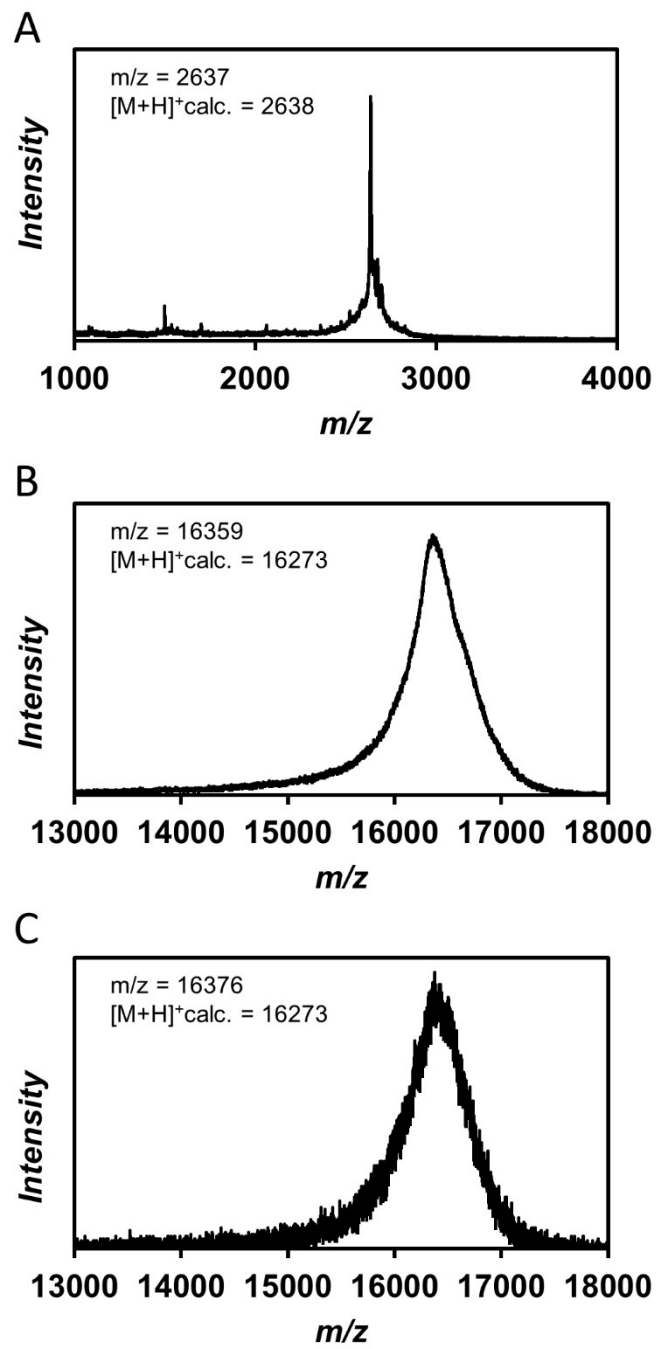

**Supplemental Figure 1.** MALDI-TOF MS spectra of (A)  $\beta$ -Annulus-GGGCG, (B)  $\beta$ -Annulus-TE02 and (C)  $\beta$ -Annulus-random DNA.

A

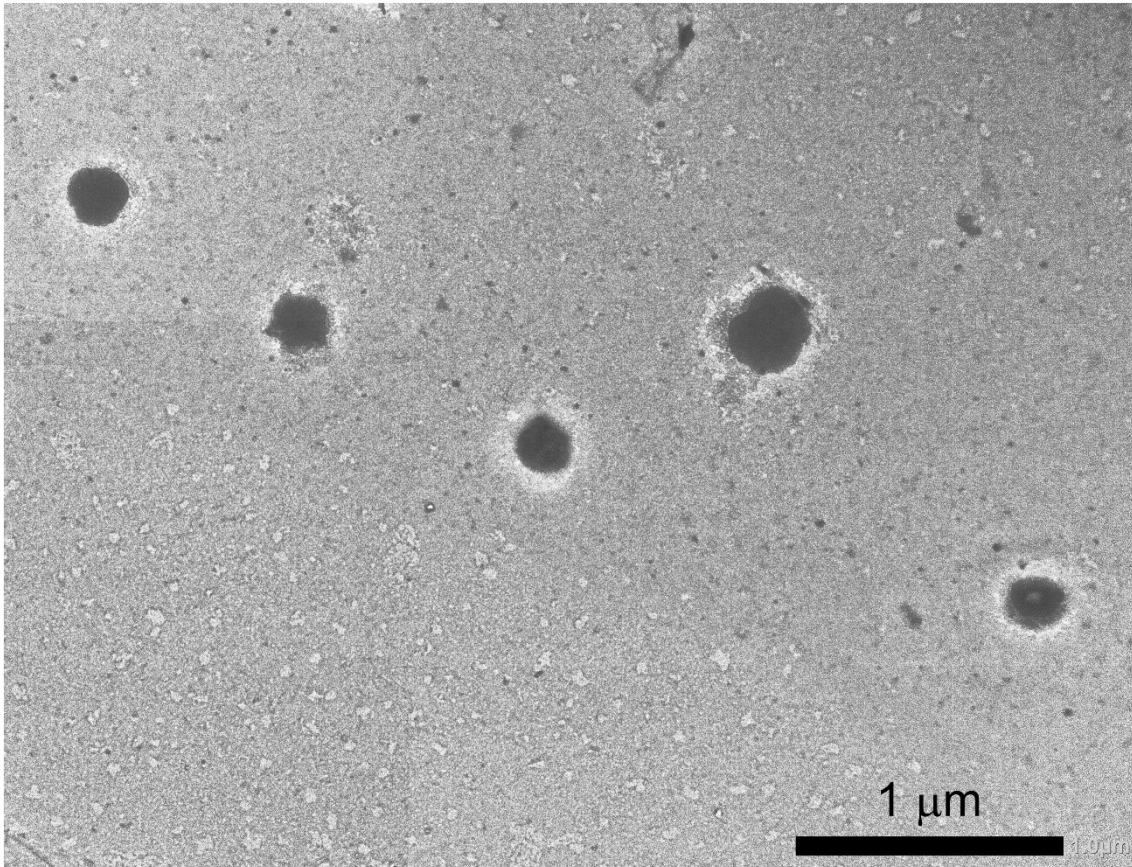

B

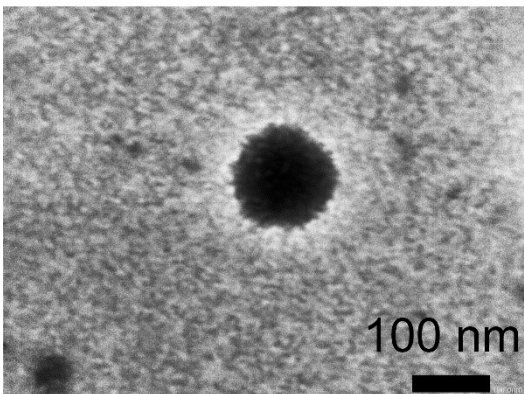

C

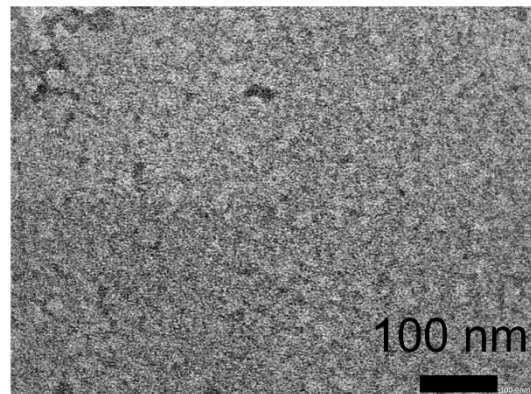

**Supplemental Figure 2.** (A) Low-magnification image of 25  $\mu\text{M}$   $\beta$ -Annulus-TE02, (B) 25  $\mu\text{M}$   $\beta$ -Annulus and (C) 25  $\mu\text{M}$  TE02 in 10 mM phosphate buffer.

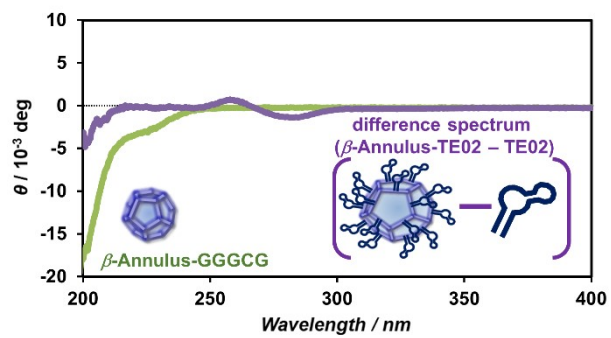

**Supplemental Figure 3.** Difference spectrum of CD measurement between  $\beta$ -Annulus-TE02 and TE02.

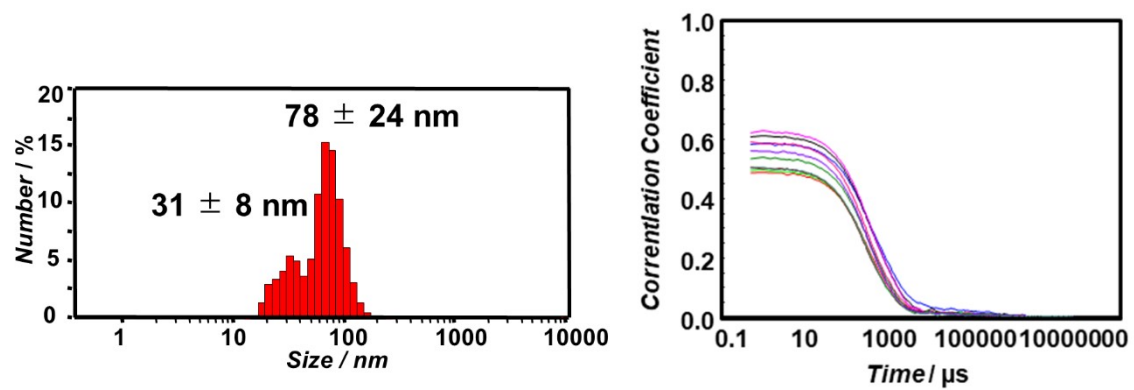

**Supplemental Figure 4.** Nanoparticle formation of co-assembly of TAMRA- $\beta$ -Annulus and  $\beta$ -Annulus-TE02. Size distribution (left) and autocorrelation curve (right) obtained from DLS.
